# Supplementary material for: Homeostatic modulation on unconscious hedonic responses to food
Source: PubMed Central journal article supplement (PMC5658914; doi:10.1186/s13104-017-2835-y), 2017-10-26
Supplement: 13104_2017_2835_MOESM3_ESM.pdf [file 13104_2017_2835_MOESM3_ESM.pdf]

**Additional File 3: Supplementary Table 1.** Mean ( $\pm$  standard error) scores and the correlation coefficients.

| Scale                                | Mean ( $\pm$ standard error) |            | Correlation |       |        |       |        |       |        |        |  |  |
|--------------------------------------|------------------------------|------------|-------------|-------|--------|-------|--------|-------|--------|--------|--|--|
|                                      | Hungry                       | Full       | 1           |       | 2      |       | 3      |       | 4      |        |  |  |
|                                      |                              |            | Hungry      | Full  | Hungry | Full  | Hungry | Full  | Hungry | Full   |  |  |
| 1 Subliminal preference difference   | 0.1 (0.0)                    | -0.1 (0.0) |             |       |        |       |        |       |        |        |  |  |
| 2 Supraliminal preference difference | 3.7 (0.3)                    | 2.2 (0.3)  | -0.07       | 0.30  |        |       |        |       |        |        |  |  |
| 3 Restrained eating                  | 2.5 (0.2)                    | 2.2 (0.1)  | -0.38 *     | 0.06  | 0.16   | -0.10 |        |       |        |        |  |  |
| 4 Emotional eating                   | 2.7 (0.2)                    | 2.4 (0.1)  | 0.20        | -0.09 | 0.22   | -0.12 | 0.17   | 0.18  |        |        |  |  |
| 5 External eating                    | 3.6 (0.1)                    | 3.5 (0.1)  | 0.35 *      | -0.19 | 0.25   | 0.04  | -0.30  | -0.26 | 0.25   | 0.70 * |  |  |

\*  $p < 0.05$ .
